# Supplementary material for: Perceptions of Healthcare Personnel on End-of-Life Care: Challenges and Gaps in a High-Complexity Center
Source: Research Square preprint supplement (doi:10.21203/rs.3.rs-6974517/v1), 2025-07-08
Supplement: Supplementary file 1 [file 49a2e99dd03e91dd036a9418.docx]

End-of-life is defined as the stage in which vital functions begin to decline until they cease. The duration of this period can range from a few hours to several weeks. It is essential that individuals are able to experience death with dignity, surrounded by their loved ones.

Throughout history, death has been understood as an inevitable and natural part of life. However, in recent times, it has increasingly become a process marked by the absence of symbolic elements and dominated by technical and scientific factors.

This survey was developed to assess the perceptions of the healthcare personnel at the Shaio Clinic Foundation regarding the care of patients in their final days of life, based on in-hospital support and both professional and personal experience. **Please note that participation in this survey is voluntary and anonymous.**

***Socio-demographic data***

Gender: Male: Woman: Indeterminate:

Age: year(s)

Place of birth: _________________________________________

Profession: __________________________. Speciality_______________________

Work area: ___________________________________

Years of work experience: ___________ year(s)

Religion: _________________________________________

***Regarding the following questions, we would like to hear about your experience with end-of-life patients during their daily activities.***

1. **How often do you deal with end-of-life care?**
   1. Frequent
   2. Rare
   3. Never
2. **¿Do you feel competent to address the topic of end of life with the patient and their families?**
   1. Competent
   2. Partially competent
   3. Incompetent
3. **¿Do you consider that you are qualified for pain management and sedation in end-of-life patients?**
   1. Trained
   2. Partially trained
   3. No training

***Mastery of interventions***

***The following questions aim to gather your perspective on various interventions used in the care of end-of-life patients. Please note that these questions are not intended to judge your responses—there are no right or wrong answers. We encourage you to answer freely and honestly.***

| **Intervention domain** | **Strongly agree** | **Agree** | **Neutral** | **Disagree** | **Strongly disagree** |
| --- | --- | --- | --- | --- | --- |
| **4. ¿**Do you agree with the use of palliative extubation in the management of end-of-life patients? |  |  |  |  |  |
| **5. ¿Do you agree that end-of-life patients receive enteral (nasogastric tube or gastrostomy) or parenteral nutrition?** |  |  |  |  |  |
| **6. ¿Do you agree that end-of-life patients should continue with antibiotic treatment?** |  |  |  |  |  |
| **7. ¿Do you agree that end-of-life patients should continue with pharmacological thromboprophylaxis?** |  |  |  |  |  |
| **8. ¿Do you think that vital signs should be taken in patients at the end of life?** |  |  |  |  |  |
| **9. ¿Do you think that glycometry should be performed on patients at the end of life?** |  |  |  |  |  |
| **10. ¿Do you think that periodic paraclinical tests should be taken in patients at the end of life?** |  |  |  |  |  |
| **11. ¿Do you think that renal replacement therapy should be continued in patients at the end of life?** |  |  |  |  |  |
| **12. ¿Do you think that blood component transfusion should be performed on patients at the end of life?** |  |  |  |  |  |
| **13.Do you consider the withdrawal of vasopressor and/or inotropic support in end-of-life patients?** |  |  |  |  |  |
| **14. ¿Are you considering deactivating cardiac pacing devices (pacemakers, ICDs, CRTs) in end-of-life patients?** |  |  |  |  |  |
| 15. **¿Do you consider psychological support necessary for end-of-life patients?** |  |  |  |  |  |
| **16. ¿Do you consider psychological support necessary for the relatives of end-of-life patients?** |  |  |  |  |  |
| **17. ¿Do you think that an end-of-life patient needs social work support?** |  |  |  |  |  |
| **18 ¿Do you consider that spiritual support is necessary for end-of-life patients?** |  |  |  |  |  |

***Emotional/Spiritual Mastery***

***Through the following questions, we seek to know your opinion on the emotions that health professionals may experience when faced with end-of-life patients. We remind you that these questions are not intended to judge, nor are there any right or wrong answers. Please feel free to respond.***

**19.Does talking about end of life work for you?**

- 1. **Easy**
  2. **Uncomfortable**
  3. **It does not contemplate it**

**20. ¿Do you think that your personal experience in approaching end-of-life patients influences the way you approach these patients and their families?**

1. Yes
2. No

21. With a single word, write what is the first thought when confronting the patient's family at the end of life.

_________________________________________

**22. ¿Do you consider your religious or spiritual beliefs to be relevant when making the decision to start the end-of-life protocol?**

- 1. **Very important**
  2. **Important**
  3. **Unimportant**
  4. **No relevance**

1. **At what point do you think the intervention of the multidisciplinary group (doctors, nurses, psychologists, ¿social work and spiritual support) should be provided?**
   1. **On admission to hospitalization**
   2. **During the hospital stay**
   3. **When you die**
2. **At what point did you request the intervention of the multidisciplinary group (doctors, nurses, psychologists, ¿social work and spiritual support) in your professional experience?**
   1. **On admission to hospitalization**
   2. **During the hospital stay**
   3. **When you die**
3. **Do you feel the need for multidisciplinary support (psychological, social work, ¿spiritual) when you approach the patient at the end of life?**
   1. **Yes**
   2. **No**
4. **¿Do you consider it necessary for the patient or family member at the end of life to sign an informed dissent for the performance of resuscitation maneuvers?**
   1. **Yes**
   2. **No**
5. ¿Do you believe there is medicolegal risk in the management of end-of-life patients if there is no signed dissent document regarding advanced resuscitation measures?
   1. **Yes**
   2. **No**

***Academic Proficiency***

***The following questions aim to understand your views on the importance of academic training in the care of end-of-life patients. Please note that these questions are not intended to be judgmental—there are no right or wrong answers. You are encouraged to respond freely and honestly.***

1. **¿Do you know if the institution has a protocol for the care of patients at the end of life?**
   1. **Yes**
   2. **No**

**If yes, please answer question 28.**

**29. ¿Are you aware of institutional policies for the management of end-of-life patients?**

- 1. **Yes**
  2. **No**

30.How often do you think training should be provided in communication strategies and in the approach to end-of-life patients and their families?

- 1. **Annual**
  2. **Semiannual**
  3. **Quarterly**
  4. **Monthly**
  5. **No need**

**31. ¿Do you consider that your professional training is adequate for the approach to the patient at the end of life?**

1. **Yes**
2. **No**

**32. ¿Do you think that training health personnel with more work experience allows them to better handle end-of-life situations?**

- 1. **Yes**
  2. **No**
